# Supplementary material
Source: Springer Nature journal article supplement (https://www.springermedizin.de/resource/supplementary/12885_2012_3611_MOESM4_ESM.pdf/9464166)

# TOX3

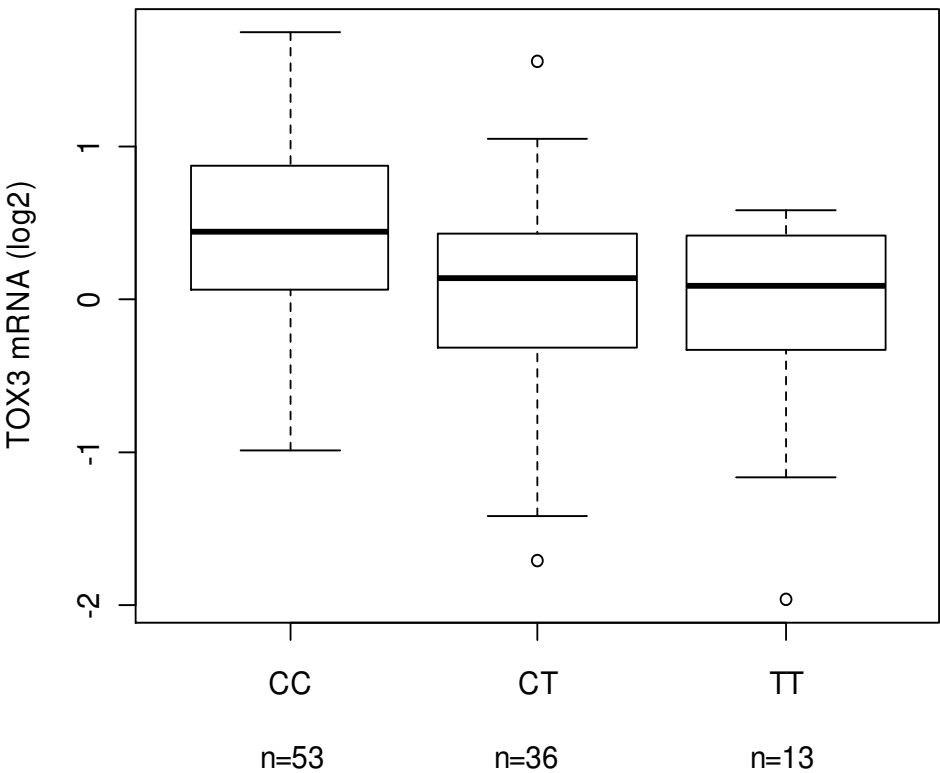

Supplement: MOESM4 [file 9464166]
